# Supplementary material
Source: Springer Nature journal article supplement (https://www.springermedizin.de/resource/supplementary/12887_2013_867_MOESM1_ESM.pdf/9475954)

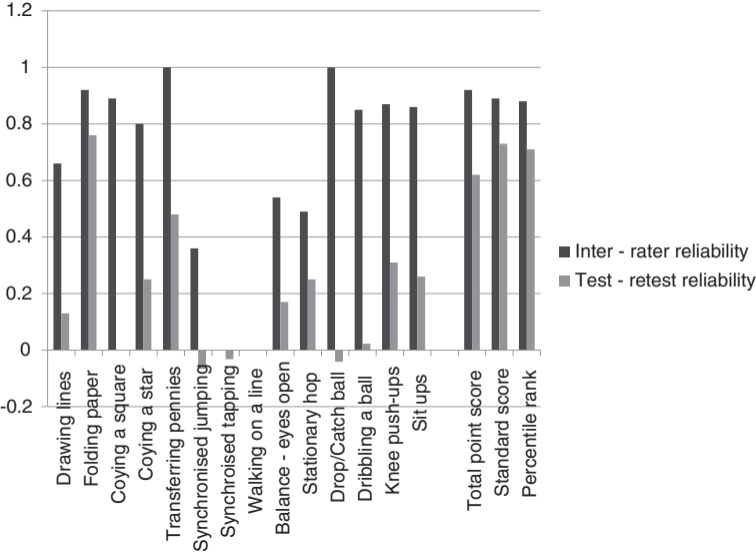

Supplement: MOESM1 [file 9475954]
